# Supplementary material for: Glacier geometry limits the propagation of thinning in Patagonian Icefields
Source: Copernicus journal article supplement (doi:10.5194/egusphere-2024-1053), 2024-05-14
Supplement: Supplementary file [file egusphere-2024-1053-AC3-supplement.pdf]

## Responses to Comments (C) Reviewer 3 (R3)

**General comment R3:** The manuscript by Morales and others represents a major and impressive amount of work, with a thorough assessment of the interactions between glacier geometry and past and future change of the Patagonian Icefields. To my knowledge, the work is unique and novel, and, through coupling Peclet number analysis with force balance analysis, is innovative in its approach. The authors link the rapid decline of some glaciers within the Patagonian Icefields to their geometric properties.

However, despite the significance and extent of this work, several factors limit the impact of this work and prevent me from endorsing it for publication in its current form.

### Response to general comment R3:

Dear reviewer, we sincerely appreciate your comments on our manuscript and the recognition of the novelty and importance of our research on the interaction between glacial geometry and changes in the Patagonian Ice Fields (PI).

To address the identified limitations that affect the work's impact, we have substantially restructured the manuscript and updated our experiments based on newly available data. First, we have significantly simplified the presentation of results to focus on three main findings: (1) the identification of the empirical thinning limit at  $Pe \leq 21$ , (2) the relationship between  $Pe$  maxima and subglacial topographic features, and (3) the assessment of glacier vulnerability based on the area under the empirical limit.

The methodological basis of the study has been strengthened by incorporating the most recent subglacial topography dataset from Fürst et al. (2024), which includes over 1.4 million thickness observations. Furthermore, due to the recent update of existing velocity products for PI and the consequent loss of valid velocity pixels for the year 2000, we decided to implement the  $Pe$  solution developed by Felikson et al. (2021) that does not use observed velocity data. We simplified our analysis using centerlines instead of multi-streamline averages and incorporated statistical analysis to validate the identified empirical boundary.

A complete verification and restructuring of the methodology and results sections has improved the presentation of the manuscript. Figures have been redesigned to illustrate our main findings directly, and the discussion has been refined to establish more explicit connections between glacier geometry and observed thinning patterns. This is also reflected in the new supplementary material.

We believe that these changes have substantially improved the clarity and rigor of the manuscript while maintaining its original scientific contribution to understanding how glacier geometry controls thinning propagation in the Patagonian Ice Fields. Finally, we make the data and associated codes available for the full reproduction of our analysis.

### References:

Felikson, D., A Catania, G., Bartholomäus, T. C., Morlighem, M., & Noël, B. P. (2021). Steep glacier bed knickpoints mitigate inland thinning in Greenland. *Geophysical Research Letters*, 48(2), e2020GL090112.

Fürst, J. J., Farías-Barahona, D., Blindow, N., Casassa, G., Gacitúa, G., Koppes, M., ... & Schaefer, M. (2024). The foundations of the Patagonian icefields. *Communications Earth & Environment*, 5(1), 142.

### Major comments/general points

**R3C1:** The methods section is hard to follow, so it is difficult for me to know what exactly is being presented in the results section. I don't believe I would be able to reproduce this work. For example, I'm not sure how the authors assign a single  $Pe$  to an entire glacier (or region of a glacier?), as in Figure 6E.

**Response to R3C1:** We thank the reviewer for this critical comment on methodological clarity. We have completely restructured the methodology section to improve its reproducibility and clarity. Significant changes include a complete reorganization of section 2, now divided into logical subsections that present the data sources (2.2), data processing (2.3), calculation of the Péclet number (2.4), the empirical thinning limit (2.5), and the relationship between topography and glacier geometry (2.6).

In particular, we have clarified the process of calculating the Péclet number, specifying that it was performed along the centerlines of each glacier at 50-meter intervals. Data extraction and processing are now explained step-by-step, including the use of the Savitzky-Golay filter to reduce noise in the profiles.

The analysis of the empirical thinning limit has been mathematically detailed by equations 3 and 4, which describe how cumulative thinning and its percentage are calculated. We have also clearly explained how we identified the local maxima of  $Pe$ .

In a specific subchapter, we include all the tools and libraries used: Python 3.11, NumPy, Pandas, SciPy, and QGIS 3.22. In addition, we release all the codes generated to reproduce our results and analysis. This makes the study transparent and guarantees complete reproducibility, facilitating future research that seeks to apply and/or expand our analysis.

**R3C2:** The results presented are so extensive and thorough that it is hard to identify the specific patterns that the authors intend to draw the readers' attentions to. The same is true for the Study Area section. Within the scatter plots of Figs 5-8, there are so many plots, and most of them do not appear to be discussed at all. I recommend that the authors identify just those critical pieces of information necessary to support their discussion and conclusions sections and eliminate the remainder. Superfluous information, while potentially valuable for some purposes, distracts from the main points and "muddies the water," reducing the impact of your paper.

**Response to R3C2:** We appreciate this important observation regarding the presentation of results. We have substantially simplified the presentation of our findings, removing extraneous information and focusing on the critical patterns that support our main conclusions. In particular, we have significantly reduced the number of figures and graphs, keeping only those

that directly illustrate our identification of the empirical thinning limit ( $Pe \leq 21$ ) and its relationship to subglacial topography.

The results section now more clearly and directly presents key patterns: the distribution of cumulative thinning relative to Péclet number, the relationship between  $Pe$  maxima and bed characteristics, and the vulnerability of glaciers according to the area under the empirical limit. Each remaining figure is fully discussed in the text and contributes directly to our main conclusions, thus improving the clarity and impact of our findings.

Additionally, we have condensed the study area section to include only the contextual information essential to understanding our results, removing secondary details that do not directly contribute to our research objectives.

**R3C3:** At the same time, some of the results discussed in the text, like the percentage of the modern Patagonian Icefields that are susceptible to future diffusive thinning, do not appear supported by any figures. I'm not sure where to find this valuable information.

**Response to R3C3:** Dear reviewer, the relevant information was represented in Figure 5 of the old version of the manuscript. However, we agree that this information was not appropriately represented. Due to the new structure used in the results section, these data are specified in Figure 3. In this new figure, we explicitly added the area under the empirical limit for each of the glaciers with a limit found. Additionally, in the released codes, it is possible to directly reproduce the values mentioned in the current text of the manuscript.

**R3C4:** Given the length of the manuscript and the need to better highlight/focus on particularly critical scientific results, it may well be necessary to cut significant portions of the text, and perhaps even analyses, to keep the length reasonable and not distract the reader with non-essential detail.

**Response to R3C4:** We appreciate this important suggestion regarding the length and focus of the manuscript. We have substantially restructured the results section to emphasize the most critical scientific findings. In particular, we have reorganized the section to focus on two key results: (1) the identification of the empirical thinning limit at  $Pe \leq 21$ , which encompasses more than 95% of ice thinning, and (2) the strong correlation between  $Pe$  maxima and subglacial topographic features.

We removed analyses related to the balance of forces and focused our analysis on thinning behavior and frontal changes with respect to the Péclet number. We believe this restructuring allows for a straightforward presentation of our scientific contributions and a more efficient address of our research objectives.

**R3C5:** The fluency of the writing is not where it needs to be. I suggested grammatical edits for the first page or so before I stopped. The entire manuscript needs careful editing for clarity of language.

**Response to R3C5:**

In response to your feedback, we have conducted a thorough review of the manuscript to improve the clarity and fluency of the writing significantly. The implemented changes include a complete restructuring of sections to improve the logical flow of the text, particularly in the

methodology and results, simplifying complex sentences, and removing redundancies to enhance comprehension. In addition, we conducted a detailed review of grammar, punctuation, and sentence structure.

**R3C6:** Throughout the manuscript, “ice flow” is used where some form of ice amount seems implied, like glacier surface area. Please correct.

**Response to R3C6:** We thank the reviewer for this important observation. We have carefully reviewed the entire manuscript and replaced all instances where 'ice flow' was incorrectly used to refer to glacier area or extent. Specifically, we now use 'glacier surface area' when referring to the spatial extent of glaciers below the thinning limit. For example, we modified the text to read '...on average ~76% of the glacier surface area of PI glaciers is below the thinning limit' instead of using 'ice flow.' This change has been applied consistently throughout the manuscript to improve clarity and technical accuracy.

**R3C7:** In light of these limitations, I do not feel like I was able to properly evaluate the present work. I could not follow the chain from methods to results to discussion. As such, I would not consider this a complete and thorough review. After revision, the manuscript will require a fresh and complete review.

**Response to R3C7:**

We appreciate your honest assessment of the limitations of conducting a full manuscript review. We understand that the lack of clarity in the connection between methods, results, and discussion significantly hampered the evaluation of our work. In response to this concern, we have substantially restructured the manuscript to establish a clear and logical sequence between these critical sections. The changes include a complete reorganization of the methodology, now divided into well-defined subsections, a significant simplification of the results section to focus on the most relevant findings, and a more focused discussion that connects directly to these results.

**R3C8:** I wish I could be more encouraging as to the state of the present work, and I applaud the ambition of the current study. My best wishes to the authors.

**Response to R3C8:**

Dear reviewer, we sincerely appreciate your recognition of the ambition of our study and your good wishes. We believe that your constructive and detailed comments, together with those of the other reviewers while identifying important areas for improvement, have been instrumental in significantly increasing the quality of our manuscript.

**Specific/minor comments/Line edits:**

**R3C9:** L 10: Some ambiguity-- gradient of slope of the bed, or of the surface? If surface, I think this would be more clear if this was the “gradient of surface topography.” Unless you intend to actually refer to the topographic curvature, as in the gradient of the gradient of surface elevation (which is what you’ve written)?

**Response to R3C9:** In this case, we were referring specifically to the bed slope gradient, corresponding to the second derivative of bed elevation. We have modified this information throughout the text to avoid confusion.

**R3C10:** L 11-12: Why 53% of “ice flow,” Do you just mean surface area? How do you quantify a percent of ice flow? What’s the baseline for that ratio?

**Response to R3C10:** We thank the reviewer for pointing out this ambiguity. We were indeed referring to glacier surface area and not ice flow. We have corrected this throughout the manuscript, including the abstract, where we now state that '~76% of the glacier surface area' lies below the empirical thinning limit. This percentage represents the proportion of the total glacier area that lies between the terminus and the empirical thinning limit ( $Pe \leq 21$ ). For clarity, we have rewritten these sections to specify that we are referring to glacier surface area, indicating the distances inland where this limit lies (on average 25 km and a maximum of 59 km from the terminus). The calculation is based on the ratio of the cumulative area from the terminus to the empirical limit divided by the total glacier area, thus providing a straightforward quantification of what proportion of each glacier is potentially vulnerable to diffusive thinning.

**R3C11:** L 17-18: “allows us to project” makes it seem like you’re taking credit for this work.

**Response to R3C11:** We thank the reviewer for pointing out this inaccuracy in the wording, and we have corrected the text.

**R3C12:** L 20: “that glaciers there have lost”

**Response to R3C12:** Hemos corregido la frase asociada.

**R3C13:** L 26: specify what types of “contributions” you’re referring to.

**Response to R3C13:** We modified the text to explicitly specify that we are referring to their contribution to sea level rise on a global scale, rewriting the sentence as "their contribution to sea level rise on a global scale."

**R3C14:** L 27-28: Glacier geometry plays a much broader role on ice flow than is supported just by these manuscripts. Broader lit review is necessary. Even to a textbook.

**Response to R3C14:**

Dear reviewer, we have added the following basic references:

- Nye, J. F. The mechanics of glacier flow. *Journal of Glaciology*, 2(12), 82-93. 1952.
- Paterson, W. S. B. *Physics of glaciers*. Butterworth-Heinemann. 1994.
- Hooke, R. L. *Principles of glacier mechanics*. Cambridge University Press. 2005.

**R3C15:** L 29: access of meltwater to what?

**Response to R3C15:** We have modified the text to specify that we are referring to meltwater access to the glacier bed. The sentence now reads, "This geometric control influences the access of meltwater to the glacier bed and consequent basal lubrication," which explicitly clarifies that

meltwater accesses the glacier bed, which is critical to understanding its role in basal lubrication.

**R3C16:** L 30: the “balance of forces” is nearly synonymous with ice flow dynamics. Why is this point different than the citations for ice flow dynamics?

**Response to R3C16:** We thank the reviewer for highlighting this conceptual redundancy. In the revised version, we have removed the reference to the “balance of forces” and reorganized this section to focus specifically on the distribution of stresses. The references cited in this section (Catania et al., 2020; Enderlin et al., 2018; Pfeffer, 2007; Van Der Veen, 1996) focus specifically on studies that analyze how glacier geometry affects the spatial distribution of these stresses and their consequences on glacier stability, thus differentiating themselves from previous references that deal with general ice flow dynamics.

**R3C17:** L 32: Much better would be to cite some of the old Nye or Harrison papers that are first cited in Felikson 2017, for example “The response of glaciers and ice-sheets to seasonal and climatic changes” by Nye in 1960.

**Response to R3C17:** Nye (1960) was cited and referenced in the main text.

Reference:

Nye, J. F.: The response of glaciers and ice-sheets to seasonal and climatic changes, Proc R Soc Lond A Math Phys Sci, 256, 559–584, <https://doi.org/10.1098/rspa.1960.0127>, 1960.

**R3C18:** L 37: “glaciers in West Greenland” or “glaciers in western Greenland”

**Response to R3C18:** Text corrected.

**R3C19:** L 38: “it has been found” è use active voice

**Response to R3C19:** The change was made using active voice.

**R3C20:** L 39: revise typos

**Response to R3C20:** We have verified and corrected the typos.

**R3C21:** L 40: “overdeepened regions”

**Response to R3C21:** The grammatical correction was made in the sentence.

**R3C22:** L 41: I think you mean retreat “extent” (as in length), not duration as in time.

**Response to R3C22:** We appreciate your correction; we did indeed refer to 'extent' in terms of length. We have corrected the text.

**R3C23:** Here, I’m ceasing line edits. There are too many to track and suggest edits for each one. This manuscript will need thorough and complete editing for grammar and clarity.

**Response to R3C23:** Dear Reviewer, We have thoroughly reviewed the text for grammar and clarity to provide the most refined version possible.

**R3C24:** L 63: In referencing potential for sea level rise, cite the original papers that the IPCC cites, not the IPCC itself.

**Response to R3C24:** Dear reviewer, we have added the following references: Dussailant et al., 2019; Braun et al., 2019; Millan et al., 2019.

Referencias:

Dussailant, I., Berthier, E., Brun, F., Masiokas, M., Hugonnet, R., Favier, V., Rabatel, A., Pitte, P., and Ruiz, L.: Two decades of glacier mass loss along the Andes, *Nat Geosci*, 12, 802–808, <https://doi.org/10.1038/s41561-019-0432-5>, 2019.

Braun, M. H., Malz, P., Sommer, C., Farías-Barahona, D., Sauter, T., Casassa, G., Soruco, A., Skvarca, P., and Seehaus, T. C.: Constraining glacier elevation and mass changes in South America, <https://doi.org/10.1038/s41558-018-0375-7>, 1 February 2019.

Millan, R., Rignot, E., Rivera, A., Martineau, V., Mouginot, J., Zamora, R., Uribe, J., Lenzano, G., De Fleurian, B., Li, X., Gim, Y., and Kirchner, D.: Ice Thickness and Bed Elevation of the Northern and Southern Patagonian IcefieldsPI, *Geophys Res Lett*, 46, 6626–6635, <https://doi.org/10.1029/2019GL082485>, 2019.

**R3C25:** L 67: here again is ice flow, when I think you mean ice field, as in “area” (not motion).

**Response to R3C25:** Dear reviewer, indeed, as you mentioned and we have clarified in the previous comments, we are referring to 'glacier surface area.' We have corrected the text to read "that glacier geometry limits the propagation," removing the incorrect reference to "ice flow."

**R3C26:** L 120: This is starting to feel like a laundry list of various glacier facts, without a framework for identifying what are the most important points. Can you synthesize more so as to better call attention to what facts are most relevant for the paper?

**Response to R3C26:** Dear reviewer, indeed, an extremely extensive description of the study area was not appropriate, which does not generate any significant positive impact on our research. Due to the above, we have reduced the study area subsection. We appreciate your comment that allowed a more concise description of the study area.

**R3C27:** L122-146: Again, this is a lot of information, and I, the reader, don't yet have any real context as to what of this is necessary or how it would slot into the paper. This section should all be motivated by the Intro. I don't see how it is.

**Response to R3C27:** We thank the reviewer for highlighting this important structural issue. We agreed that the section contained excess information without a clear connection to the study's objectives. In response to his comment, we have completely restructured the section by removing non-essential details.

**R3C28:** Figure 1: This is a beautiful map. Nice going.

**Response to R3C28:** Dear reviewer, thank you for your feedback.

**R3C29:** L 164: Why not use the glacier thickness data from Millan 2022? In that paper, they show that it performs much better than the Farinotti dataset for icefields, and so is much more appropriate here.

**Response to R3C29:** Dear reviewer, we re-did all our calculations using the recent model released by Furst et al. (2024), which was calibrated with local measurements that had not been published until then; now, our results are based on the state-of-the-art model for the region.

Referencias:

Fürst, J. J., Fariás-Barahona, D., Blindow, N., Casassa, G., Gacitúa, G., Koppes, M., ... & Schaefer, M. (2024). The foundations of the Patagonian icefields. *Communications Earth & Environment*, 5(1), 142.

**R3C30:** L 180: I'm not clear on what it means to use the gradient of the velocity as a mask for flowlines. Also, I would call these "profiles" rather than flowlines if they're manually delineated and not actually following flow. Why aren't they just following flow? That would be cleaner and preferable to using manually delineated profiles. I've written a tool to extract flowlines from any velocity dataset, and it's here: <https://github.com/tbartholomaeus/project-tools>

Maybe it's useful to you?

**Response to R3C30:** Dear Reviewer, we appreciate this valuable comment. Indeed, the generation of the flowlines could have been done by developing an appropriate algorithm such as the one you provided. However, we believe that due to the discharge in different directions of some of the glaciers (commented by Reviewer 1) and because of what is raised in R3C43, using the flowlines could make our analysis more complex. Considering the above, we believe that adopting the central line is a more appropriate approach. This approach has been previously implemented in large-scale analyses (for example, Felikson et al., 2017). Additionally, we have replaced all references to 'flowlines' with 'central line' in the text.

References:

Felikson, D., Bartholomaeus, T. C., Catania, G. A., Korsgaard, N. J., Kjær, K. H., Morlighem, M., Noël, B., Van Den Broeke, M., Stearns, L. A., Shroyer, E. L., Sutherland, D. A., and Nash, J. D.: Inland thinning on the Greenland ice sheet controlled by outlet glacier geometry, *Nat Geosci*, 10, 366–369, <https://doi.org/10.1038/ngeo2934>, 2017a

**R3C31:** L 190: specify "surface slope"

**Response to R3C31:** We have specified the information in the text.

**R3C32:** L 191: partial with respect to x needs no definition

**Response to R3C32:** We eliminate the definition of the partial derivative with respect to x.



**R3C33:** L 193: “motion of the perturbation” as a whole is more than just advection.

**Response to R3C33:** Dear reviewer, thank you for the clarification. To avoid any confusion, we have removed this information from the text.

**R3C34:** L 197: “length”? do you mean span? Or distance from the terminus?

**Response to R3C34:** Dear reviewer, thank you for pointing out this ambiguity. We have corrected the text to specify that "l" represents the distance from the glacier terminus to any position along the centerline.

**R3C35:** L 199: What is “upper current”?

**Response to R3C35:** We thank the reviewer for pointing out this error. The term "upper current" was a translation error. The term is intended to refer to ice flow in the upglacier regions. In the revised version of the manuscript, we have replaced "upper current" with "upglacier regions."

**R3C36:** L 205-206: Are these characteristic dimensions of some sort, or dimensions at a specific location?

**Response to R3C36:** We thank the reviewer for highlighting this lack of clarity. In the revised version of the manuscript, we have clarified that the variables  $\alpha_0$  and  $H_0$  represent the surface slope and thickness of the glacier, respectively, measured at each point  $x$  along the centerline.

**R3C37:** L 206: is  $U_0$  the average speed? Sliding speed?

**Response to R3C37:** Dear reviewer, thank you for this observation. The highlighted text corresponds to the average velocity of the glacier, given the methodological basis of the approach used. In the revised version of the manuscript, this specification is no longer necessary since we have adopted the model developed by Felikson et al. (2021) to calculate the Péclet number, which does not require surface velocity data. This methodological decision was made due to the limitations found in the updated velocity products for 1999-2000. These present a significant increase in null pixels in regions where we previously had data, making an appropriate and consistent analysis difficult.

**R3C38:** L 213: How did you combine data from the full glacier lengths to arrive at an average  $Pe$  value for each glacier?

**Response to R3C38:** This operation involves averaging the mapped flowline indices. For example, the average of the first six vertices of each flowline. We believe that this may lead to spatial discrepancies that could affect our analysis. Therefore, we decided to redo our analysis using only the central line of the glacier.

**R3C39:** L 224: What are “distance units”?

**Response to R3C39:** Dear reviewer, thank you for pointing out this inaccuracy in the specification of distance units. In the revised version of the manuscript, we have replaced the ambiguous phrase "distance units" with "We extracted elevation changes at 50-meter intervals along the centerline".

**R3C40:** L 229: Do you mean Meier et al. as the authors, or are you referring to yourselves?

**Response to R3C40:** We appreciate your comment. In the associated text, we did not refer to "we"; it was related to Meier et al. (2018). We have explicitly modified the text by adding this information: Meier et al. (2018) delineated the glaciers through a semi-automated process using satellite images from the Landsat and Sentinel constellations for this last inventory.

**R3C41:** L 261: I'm not aware of this reference, but surely there's some caveat to this. 98% sliding can't be true throughout the entire icefield.... Even up at high elevation, slow-flowing areas? Even on the Greenland Ice Sheet, at a spot with about 100 m/a flow, internal deformation is 30-50% of the surface speed. I don't think this need throw off your entire analysis, but it seems important to recognize and consider the implications.

**Response to R3C41:** Dear reviewer, we thank you for this important observation regarding the inadequate generalization of basal sliding conditions. We acknowledge that our extrapolation of the 98% basal sliding observed at San Rafael Glacier (according to Collao-Barrios et al., 2018) to the entire ice field was poorly constrained, especially considering the spatial variability of dynamics, climate, and topography.

In the revised version of the manuscript, given the associated comments from Reviewer 2, we have removed the force balance analysis and focused on the study of glacier geometry and its relationship to thinning propagation.

**R3C42:** L 266: the value you give for gravity is an acceleration, not a force.

**Response to R3C42:** We sincerely regret this error and have removed this inaccurate reference as part of a broader restructuring that excludes balance of power analysis from our research.

**R3C43:** L 270: Why is this averaging approach? Also, what if the flow lines branch and either stay apart or re-converges around a nunatak? Then the different lengths of flowlines at a given locale might be offset, and the averaging would be inappropriate.

**Response to R3C43:**

Thank you for pointing out these important limitations related to averaging multiple streamlines. We agree that the original approach of averaging six streamlines could introduce significant biases, especially in cases where streamlines diverge around nunataks or have different lengths, resulting in averages not representative of actual glacier conditions. In response to this concern, we have substantially modified our methodology in the revised version of the manuscript. Specifically, we have corrected our analysis based on the centerline. Please review our response to R3C30.

**R3C44:** L 271: Filtering in the along-flow direction?

**Response to R3C44:** We thank the reviewer for requesting this clarification. In the revised version of the manuscript, we have explicitly specified that the Savitzky-Golay filter is applied along the direction of the glacier centerline, specifically in section 2.3 (Data processing and software).

**R3C45:** L 275: Are these Pe classes just rounded Pe values? If so, why introduce a different term than just the Pe values themselves? If not, how does this differ from rounded Pe values?

**Response to R3C45:** Dear reviewer, thank you for pointing out the inappropriate use of Pe classes. We have substantially simplified our approach in the revised version of the manuscript. Instead of out-of-range value classes, we now use moving windows with a fixed width of  $Pe = 1$ . Please see section 2.5 (Empirical thinning limit), where our methodology is clarified.

**R3C46:** L 279-280: No part of this sentence makes sense to me. Please find another way to convey your intention.

**Response to R3C46:** In the revised version of the manuscript, we have removed this confusing sentence entirely. This removal is part of a broader decision to remove the balance of forces analysis from the manuscript.

**R3C47:** L 291: These ‘d’s are typically differential operators and should not be used otherwise. For changes or differences, I recommend using capital Deltas.

**Response to R3C47:** In the revised version of the manuscript, we have adopted the notation  $\Delta$  to represent differential.

**R3C48:** L 292-293: Odd mixing of actual coordinates (“x”s) and indices in this terminology. Obscures meaning.

**Response to R3C48:** We have unified the notation to use exclusively spatial coordinates, where x consistently represents the distance from the glacier terminus measured along the centerline. This simplification eliminates the ambiguity that you have noticed.

**R3C49:** L 293: How is position N decided?

**Response to R3C49:** We have eliminated the index-based notation (including the N position) and instead used a more unambiguous notation based on the distance from the glacier terminus. The landward position is now expressed simply as the distance x from the terminus, measured at 50-meter intervals along the glacier centerline, thus avoiding confusion from using indices. This change simplifies the mathematical notations described in the methodology to make our analysis comprehensible.

**R3C50:** L 296: Again, while your code is probably written with respect to indices, finding indices in your equations is unnecessarily confusing.

**Response to R3C50:** We have simplified the mathematical notation to make it more intuitive and straightforward, eliminating excessive indices. This change simplifies the mathematical notations described in the methodology to make our analysis as comprehensible as possible.

**R3C51:** L 292-301: I’m really not following these methods. Can you revise the text to clarify? Or include a figure? On further consideration, the notation in equations 11 and 12 seems more complicated than necessary. Maybe reviewing with a mathematics colleague might help you find a more straightforward way of writing this out.

**Response to R3C51:** Dear reviewer, In the revised version of the manuscript, we have substantially simplified this section, replacing equations 11 and 12 with a new set of equations (3 and 4) that more directly and clearly describe the calculation of cumulative thinning.

**R3C52:** L 298: How do you define these Pe classes?

**Response to R3C52:** Dear reviewer, the classification or grouping of the data was done using a  $Pe = 1$ , except at the extremes, where values less than or greater than 0 and 10 were included, respectively. In the methodology section, we directly specify the mechanisms used for its classification. This new approach does not include values out of range at the extremes.

**R3C53:** L 301: There's a little too much in this sentence to follow. Can you break into smaller pieces to make it easier to digest?

**Response to R3C53:** Dear reviewer, we have rewritten the associated section in order to make it easier to read.

**R3C54:** L 312: I think you mean percent of area, not percent of ice flow.

**Response to R3C54:** Dear reviewer, we were indeed referring to that. We have corrected all the associated text throughout the manuscript.

**R3C55:** L 314: I'm finding this page quite difficult to follow. I don't really understand how you're running your analysis, and what the variables you're producing and discussing later in the paper will be.

**Response to R3C55:** We apologize for the lack of clarity in the presentation of our methodology. In the revised version of the manuscript, we have completely restructured the methodological section to provide a clear and logical sequence of our analysis.

**R3C56:** L 317: By slope gradient, do you mean the second derivative of the surface elevation? As in the terrain curvature, or the change in surface slope? Or do you just mean the surface slope?

**Response to R3C56:** Dear reviewer, thank you for pointing out this ambiguity in our terminology. In the revised version of the manuscript, we have clarified the definition and usage of these slope-related terms. Specifically, we have modified section 2.6 to clearly distinguish between bed slope, which is the first derivative of bed elevation with respect to horizontal distance, and bed slope gradient, which is the second derivative of bed elevation and represents the rate of change of slope, effectively being a measure of bed curvature.

**R3C57:** L 319: How do you turn prograde and retrograde slopes into percents?

**Response to R3C57:** From the front, we calculated the mean subglacial elevation gradient (in the previous analysis, the average of the indices of the six flowlines). Once calculated, regions with negative gradients were classified as retrograde and positive as prograde. The percentage corresponded to the proportion of positive and negative observations along the "mean"

flowline. The conversion to percentages is not performed in this new manuscript version. Moreover, only the central line of the glacier is used.

**R3C58:** L 336: What is an “analysis of terminus”?

**Response to R3C58:** In the old version of the manuscript, reference was made to the specific analysis of the first five kilometers of the "average" flow line from the glacier front. This is no longer done now, according to the new approach adopted, which has been previously specified.

**R3C59:** L 344-351: Unfortunately, I don't quite understand the methods sufficiently to interpret this figure.

**Response to R3C59:** Dear reviewer, we hope that the new structure of the methodology section will provide a clear perspective of the analysis mechanisms that led to these latest results.

**R3C60:** L 367: Please introduce the force balance results generally first, before diving into their changes and how changes in force balance coincide with changes in geometry.

**Response to R3C60:** In the revised version of the manuscript, we have removed the force balance analysis to focus on our main findings related to the control of glacier geometry on thinning propagation.

**R3C61:** L 374-375: How is it possible for all the resistive forces to drop but the driving stress to not drop? Otherwise, the forces are not in balance. The fact that the basal drag is the residual requires that the forces stay balanced and I'm not sure how this statement could make sense. This same point persists in Fig. 4. How can the driving stress increase, but all of the resistive stresses drop?

**Response to R3C61:** Dear reviewer, thank you for your question. In this case, we were referring to percentage variations, not absolute ones. This could have generated the conditions described in the previous version of the manuscript. It is important to note that this is not analyzed in this version of the manuscript due to the synthesis of information that has been carried out, so all the associated text has been eliminated.

**R3C62:** L 376-377: This last sentence more appropriately belongs in the discussion section.

**Response to R3C62:** Dear reviewer, we have followed your recommendations during the restructuring of the manuscript.

**R3C63:** Figure 4: What are the R and p-values here? I wouldn't have thought there should be a good basis for a linear relationship between these two terms. What's the physical justification? If there isn't a physical justification, then take these terms off.

**Response to R3C63:** Dear reviewer, we agree on the absence of a physical justification for a linear correlation analysis and p-value of these variables. Considering the above, we have eliminated all figures and associated analysis, considering the context of restructuring the manuscript.

**R3C64:** L 385-386: Can you include a plot to show these relationships? Again, I suspect you're using “ice flow” when you really mean “ice area”?

**Response to R3C64:** The requested information is now specified in Figure 3. Indeed, as we have previously mentioned, the ice area was correct.

**R3C65:** Figure 5: Are all the symbols individual glaciers? The last line of the caption implies it. Why are there no symbols for land-terminating glaciers?

**Response to R3C65:** Our research did not assess land-terminating glaciers. As mentioned in section 2.1, our analysis focuses on glaciers with areas larger than 65.5 km<sup>2</sup>, representing more than 80% of the total area of the Patagonian Ice Fields. Land-terminating glaciers were not included in the analysis since they represent a marginal fraction of the total area (only 2% in the Southern Ice Field and 18% in the Northern Ice Field, according to the data presented in the study area section) and typically correspond to smaller glaciers that do not meet our area selection criteria.

**R3C66:** L 387: I don't understand this statement. Isn't the empirical thinning limit an up-glacier location, where the Pe value exceeds some threshold (threshold of 8, in this case)? If so, how can the glacier have retreated past it? This isn't the empirical limit for retreat, is it?

**Response to R3C66:** In the experiment presented in the previous manuscript, we believe this may have occurred because 1) we did not base our experiments on maximum Pe and 2) changes in temporal gradients in mass balance affect the stability of the boundary. However, it is essential to note that no glacier has retreated beyond the newly established boundary in this manuscript version, providing signals that it is a robust value.

**R3C67:** L 398: Inappropriate, or unnecessary, 4 significant figures presented. Here and all the other four significant figure numbers in this paragraph.

**Response to R3C67:** Dear Reviewer, We have corrected all associated data by including only the appropriate significant digits.

**R3C68:** L 415-416: What does this sentence mean?

**Response to R3C68:** We thank the reviewer for this observation. Indeed, the highlighted sentence came from an earlier approach to our manuscript, where we analyzed the behavior of the first 5 km of the terminal region in terms of Péclet number, elevation changes, frontal changes, and force balance. This analysis indicated that 93% of the glaciers in the terminal region had a Pe less than eight. However, in the current version of the manuscript, we have substantially modified our approach, focusing on the identification of the empirical thinning limit ( $Pe \leq 21$ ), its landward position, and the evaluation of the glacier response in terms of frontal changes, thus eliminating the specific analysis of the terminal region and making the presentation of our main results more straightforward.

**R3C69:** L 418: Is Figure 8 mentioned here before Figs 6 and 7? All figures should be numbered according to the order they appear in the text.

**Response to R3C69:** In the revised version of the manuscript, we have completely reorganized the figures to ensure that their numbering corresponds to the order in which they appear in the text. The former Figure 8 has been removed as part of our restructuring to provide a more focused presentation of the main results. We have carefully reviewed the entire manuscript to ensure that figure references are consistent with this new order.

**R3C70:** L 420-421: Are these the lowest Pe values of this icefield? What do you mean as “standing out?” With respect to what?

**Response to R3C70:** They correspond to the lowest magnitude median Pe observed in marine-terminating glaciers in Campos de Hielo Sur, specifically for the first five kilometers from their front. In the revised version of the manuscript, we have eliminated this characterization of the Pe values in the terminal region. This modification is part of our restructuring that attempts to present the results more clearly and directly, focusing on the patterns of glacier vulnerability identified through the analysis of Pe along the entire central line and not in a specific region.

**R3C71:** L 419-426: Maybe it would be useful to plot or just make a table of these numbers? In paragraph form, I’m not sure what of these numbers are particularly important or noteworthy. Perhaps you could put all the numbers in a table, and then just synthesize them a little more to highlight the particularly important results.

**Response to R3C71:** Instead of listing all the values in paragraph form, we present this information in Figure 3, which graphically shows the distribution of vulnerable area per glacier, the distance to the empirical limit, and the differentiation between marine and lake terminus glaciers.

**R3C72:** L 427: Write out “retreat and thinning,” and perhaps first identify within the results section that thinning and retreat co-occur.

**Response to R3C72:** In the revised version of the manuscript, we have explicitly indicated the co-occurrence of these phenomena. The results section has been completely rewritten.

**R3C73:** Figure 7: The font sizes for the subscripts of the different stress components are too small to read.

**Response to R3C73:** We acknowledge your comment about the readability issues in Figure 7. However, as part of the manuscript's overall restructuring, we have removed Figure 7 and the associated force balance analysis. In the current manuscript version, we have maintained the appropriate font size in the figures.

**R3C74:** Figure 7: I’m afraid I don’t quite understand what is meant by a “median of averages” for the Peclet numbers. But to interpret, I need to know where these Pe values are for- and what they represent for each glacier. I assume this is for some region near the terminus? But I didn’t understand the methods sufficiently to get this.

**Response to R3C74:** The expression referred to the median values of the average of the six flow lines in the first five kilometers from the front of each of the glaciers evaluated. In the previous version of the manuscript, we sought to understand in more detail how the geometry of the region near the terminus modulated the propagation of thinning upstream. This analysis is no longer performed in the new version of the manuscript, so the associated information was removed.

**R3C75:** Figure 7: There is so much information in this figure but it is barely discussed in the text. Maybe only at line 470? Cut out any information that is not discussed in the text and essential to your discussion points/conclusions, as set up by your introduction section.

**Response to R3C75:** Considering the previously described changes, this information was removed entirely. Throughout the text of the new version, we have referenced the figures coherently.

**R3C76:** L 470-471: Because glaciers are an example of Stokes flow, the stresses on a parcel of ice must always balance. If you're finding that forces do not balance, either you're violating Stokes flow and the principles of a force balance, or I'm missing an important piece of your analysis.

**Response to R3C76:** In the previous discussion, we referred to the percentage increase of specific components of the force balance; in this context, the balance between them is maintained. In the revised version of the manuscript, we have decided to eliminate the force balance analysis. We decided to focus on the empirical thinning limit based on the Péclet number ( $Pe \leq 21$ ) and the consequent vulnerability for the PI glaciers.

**R3C77:** L 477: Inappropriate number of digits again.

**Response to R3C77:** Dear reviewer, thank you for pointing out this error. In the revised version of the manuscript, we considered significant digits appropriate to the context.

**R3C78:** L 483: Or, I might write that "The high  $Pe$  value of Penguin Glacier reflects geometric factors that allow Penguin to adjust its force balance through an increase in basal drag, without retreating."

**Response to R3C78:** We appreciate your suggestion to improve the explanation related to Penguin Glacier. However, in the revised version of the manuscript, we have substantially modified our approach by removing the force balance analysis to focus on the direct relationship between glacier geometry and thinning propagation.

**R3C79:** L 528-533: These are important discussion points, but the figures that demonstrate this are not clear. The important results are buried in too complete a representation of all the different results of your study. Strip down information content throughout the paper so that the important results shine, and set you up for your discussion section, like here.

**Response to R3C79:** We agreed that a more precise presentation of our main results was needed. In the revised version of the manuscript, we have substantially restructured both the results section and the discussion to highlight our most important findings. In this context, we have significantly reduced the number of figures, keeping only those that directly illustrate our main findings: Figure 2, which shows the identification of the empirical limit at  $Pe \leq 21$ ; Figure 3, which illustrates the spatial distribution of vulnerable areas, and Figure 4, which demonstrates the relationship between  $Pe$  and subglacial topographic variability.

The discussion section has been reorganized to focus on three key aspects: 1) the interpretation of the empirical limit of  $Pe = 21$  and its comparison with previous studies, 2) the relationship between  $Pe$  maxima and glacial bed characteristics, 3) and the implications for the future vulnerability of Patagonian glaciers. We removed secondary analyses that detracted from our main messages.

**R3C80:** L 541: Again, this is a result that I would really like to see conveyed in a convincing, elegant, clear figure. If you've shown it already, I'm afraid that I've missed its demonstration.



**Response to R3C80:** In response to your suggestion, we have generated a new figure (Figure 3) that more effectively illustrates the spatial distribution of areas below the empirical thinning limit. This figure includes a scatter plot relating the percentage of glacier area below the empirical thinning limit ( $Pe \leq 21$ ) to the distance inland where this limit is located and a histogram showing the frequency distribution of the vulnerable regions. The figure also incorporates the clear differentiation between marine and lake terminus glaciers using separate symbols and the specific Ice Fields region (NPI and SPI).

**R3C81:** L 544: 42 km is almost the full width of the icefield! Worth pointing out.

**Response to R3C81:** Dear reviewer, we appreciate your suggestion that in the revised version of the manuscript, we have explicitly emphasized the significant inland extension of the thinning limit, considering our new results. The text added to the discussion where this feature is highlighted is as follows:

"This widespread vulnerability is particularly significant as the area below the empirical limit extends across almost the entire width of PI."

**R3C82:** L 553: I thought that  $Pe = 8$  was the key value, but here you're writing that it's 4.85? With three significant digits? I'd think two was more appropriate given the precision of the analysis and the many approximations necessary.

**Response to R3C82:** We appreciate this comment and agree that adding three significant digits was unnecessary. Due to the new structure of the manuscript, the associated information was removed from the results section and, consequently, from the discussion section.

**R3C83:** L 578: Vulnerability is not "also" controlled by geometry. But  $Pe$  IS glacier geometry. The two points are one and the same.

**Response to R3C83:** We appreciate this important observation regarding conceptual redundancy. This section has been completely restructured in the current version of the manuscript, eliminating this redundancy.

**R3C84:** L 630: I don't quite capture the implication of this statement. Please make it more explicit.

**Response to R3C84:** In the original text, we mentioned that the difference in the surface mass balance was not included in the thickness product generated using the geodetic mass balance of Dussaillant et al. (2019). However, this no longer influences our results in the current manuscript since we excluded the force balance from our analysis.

**R3C85:** L 667-669: Be specific about the particular ways these glaciers stand out. In their distance to  $Pe=8$ ? Or some other characteristic?

**Response to R3C85:** In the revised version of the manuscript, we have incorporated a more detailed and quantitative analysis of the characteristics that make these specific glaciers stand out, taking into account the new structure of the manuscript.

**R3C86:** L 680: Code should be available now at the time of review.

**Response to R3C86:** We have released the code associated with our analysis and the dataset used, including the central lines analyzed in this manuscript version. We hope this will allow a quick and user-friendly reproduction of our results and facilitate the application of the methodology in unexplored regions.
